# Supplementary material
Source: PubMed Central journal article supplement (PMC5723535)
Supplement: NIHMS908395-supplement.pdf [file NIHMS908395-supplement.pdf]

**Familial Liability to Epilepsy and Attention-Deficit/Hyperactivity Disorder:  
A Nationwide Cohort Study**

***Supplementary Information***

Supplementary Table S1. Sensitivity analyses of the within-individual and full-sibling association between epilepsy and ADHD

Supplementary Table S2. Odds ratios (ORs) and 95% confidence interval (CI) from sensitivity analyses stratified by sex

Supplementary Table S3. Genetic and environmental parameter estimates with Bootstrap standard errors and 95% confidence interval

Table S1. Sensitivity analyses of the within-individual and full-sibling association between epilepsy and ADHD

| Model           | N of individuals | Within-individual OR (95% CI) | N of pairs | Full siblings OR (95% CI) |
|-----------------|------------------|-------------------------------|------------|---------------------------|
| Crude Estimates | 1,899,654        | 3.53 (3.39-3.68)              | 1,829,684  | 1.56 (1.46-1.67)          |
| Model 1         | 1,899,654        | 3.68 (3.45-3.89)              | 1,829,684  | 1.54 (1.40-1.69)          |
| Model 2         | 514,345          | 3.11(2.90-3.34)               | 223,520    | 1.72 (1.49-1.99)          |
| Model 3         | na               | na                            | 1,829,684  | 1.46 (1.37-1.56)          |
| Model 4         | na               | na                            | 1,829,684  | 1.13 (1.06-1.21)          |

<sup>1</sup> Odd's ratios (OR) represent the risk of ADHD in individuals with a relative with epilepsy, compared to the risk in individuals without a relative with epilepsy. <sup>2</sup> Excluding crude estimates, all estimates are adjusted for sex and birth-year of both outcome and exposure person.

Model 1. Stricter definition of exposure and outcome. 2 >= ADHD and epilepsy diagnoses from the National Patient register. Information from the PDR were excluded, as were individuals with only a diagnosis of status epilepticus (ICD codes G41,345Q) and no other epilepsy diagnosis.

Model 2. Restricted birth-cohort born 1994-1999, excluding all individuals with a record of death or migration during follow-up.

Model 3. OR comparing the risk of ADHD in individuals with a relative with epilepsy, to the risk in individuals without a relative with epilepsy, adjusting for epilepsy in the outcome person.

Model 4. OR comparing the risk of ADHD in individuals with a relative with epilepsy, to the risk in individuals without a relative with epilepsy, adjusting for ADHD in the exposure person.

Table S2. Odds ratios (ORs) and 95% confidence interval (CI) from sensitivity analyses stratified by sex

| Within Individual |                |                  |         |
|-------------------|----------------|------------------|---------|
|                   |                | OR (95% CI)      | N       |
| Male              |                | 3.41 (3.24-3.59) | 972,428 |
| Female            |                | 3.56 (3.32-3.81) | 927,226 |
| Full-siblings     |                |                  |         |
| Exposure person   | Outcome person | OR (95% CI)      | N       |
| Male              | Male           | 1.66 (1.49-1.85) | 483,218 |
| Female            | Female         | 1.52 (1.29-1.78) | 432,264 |
| Male              | Female         | 1.64 (1.42-1.89) | 457,101 |
| Female            | Male           | 1.43 (1.27-1.60) | 457,101 |

<sup>1</sup>Odds ratios (ORs) and 95% confidence interval (CI) expressing the association between epilepsy and ADHD, stratified by sex. OR are presented for the within-individual association in the full cohort and for the within-family association in full-siblings. <sup>2</sup>N refers to number of individuals for the within individual analysis and number of pairs for the full sibling-analyses. <sup>3</sup>All models were adjusted for birth-year of both exposure and outcome person.

Table S3. Genetic and environmental parameter estimates with Bootstrap standard errors and 95% confidence interval

| Parameter           | Estimate | SE  | Lower bound<br>95% CI | Upper bound<br>95% CI | p-value |
|---------------------|----------|-----|-----------------------|-----------------------|---------|
| rG                  | .21      | .10 | .02                   | .40                   | .028    |
| rC                  | .32      | .24 | -.16                  | .79                   | .191    |
| rE                  | .36      | .07 | .23                   | .49                   | <.001   |
| % PC due to A       | 40       | 16  | 9                     | 70                    | .011    |
| % PC due to C       | 11       | 7   | -3                    | 25                    | .135    |
| % PC due to E       | 49       | 9   | 32                    | 67                    | <.001   |
| % ADHD due to A     | 75       | 3   | 70                    | 81                    | <.001   |
| % ADHD due to C     | 7        | 1   | 5                     | 9                     | <.001   |
| % ADHD due to E     | 18       | 2   | 15                    | 21                    | <.001   |
| % Epilepsy due to A | 28       | 8   | 12                    | 44                    | .001    |
| % Epilepsy due to C | 10       | 4   | 2                     | 18                    | .013    |
| % Epilepsy due to E | 62       | 4   | 54                    | 71                    | <.001   |

<sup>1</sup> Reported parameter estimates were derived based on data from available pairs of full-siblings (914,842), maternal half-siblings (136,962) and paternal half-siblings (134,502) in the full cohort. Reported standard errors (SE), 95% confidence intervals (CI) and p-values were derived using bootstrap resampling (see method section for details). rG, genetic correlation; rC, shared environmental correlation; rE, non-shared environmental correlation. PC, phenotypic correlation; A, additive genetic effects; C, shared environmental effects; E, non-shared environmental effects.
